# Supplementary material for: [Ba4X][In19S32] (X = Cl, Br): two quaternary metal chalcohalides exhibiting remarkable photocurrent responses
Source: Royal Society of Chemistry journal article supplement (doi:10.1039/d3dt02766j), 2023-01-01
Supplement: d3dt02766j1.pdf [file d3dt02766j1.pdf]

**[Ba<sub>4</sub>X][In<sub>19</sub>S<sub>32</sub>] (X = Cl, Br): two quaternary metal chalcogenides exhibiting remarkable photocurrent responses**

Chunlan Tang<sup>ab</sup><sup>⊥</sup>, Wenhao Xing<sup>a</sup><sup>⊥</sup>, Fei Liang<sup>c</sup>, Jian Tang<sup>a</sup>, Jieyun Wu<sup>b\*</sup>, Wenlong Yin<sup>a\*</sup> and Bin Kang<sup>a</sup>

<sup>a</sup> Institute of Chemical Materials, China Academy of Engineering Physics, Mianyang 621900, P. R. China.

<sup>b</sup> School of Optoelectronic Science and Engineering, University of Electronic Science and Technology of China, Chengdu 611731, P. R. China.

<sup>c</sup> State Key Laboratory of Crystal Materials and Institute of Crystal Materials, Shandong University, Jinan 250100, P. R. China.

<sup>⊥</sup> Chunlan Tang and Wenhao Xing contributed equally to this work.

\*Corresponding author:

Wenlong Yin; [wlyin@caep.cn](mailto:wlyin@caep.cn)

Jieyun Wu; [jieyunwu@uestc.edu.cn](mailto:jieyunwu@uestc.edu.cn)

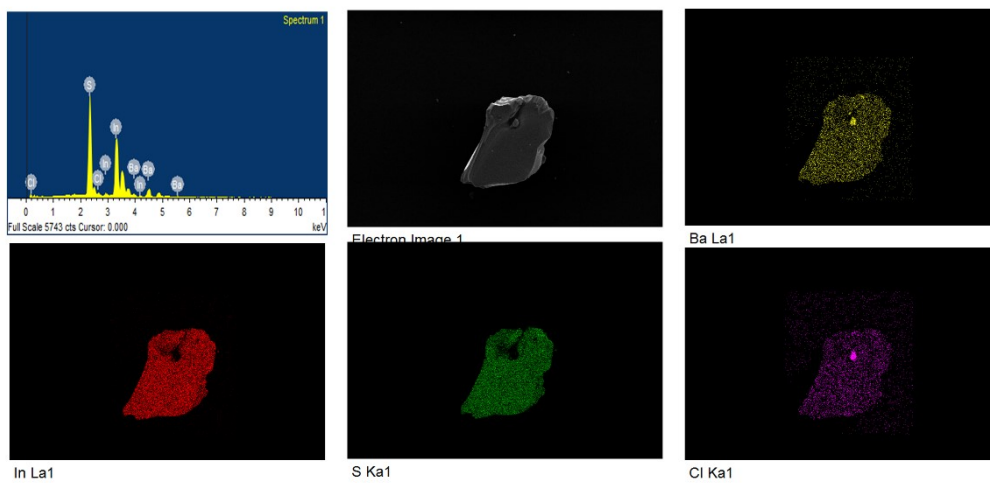

**Fig. S1.** The SEM pictures and EDS results of  $[\text{Ba}_4\text{Cl}][\text{In}_{19}\text{S}_{32}]$ .

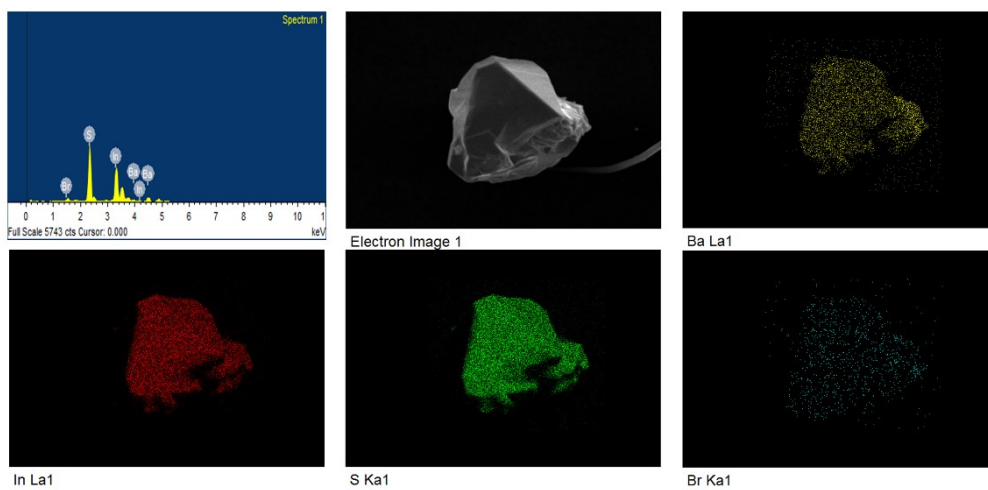

**Fig. S2.** The SEM pictures and EDS results of  $[\text{Ba}_4\text{Br}][\text{In}_{19}\text{S}_{32}]$ .

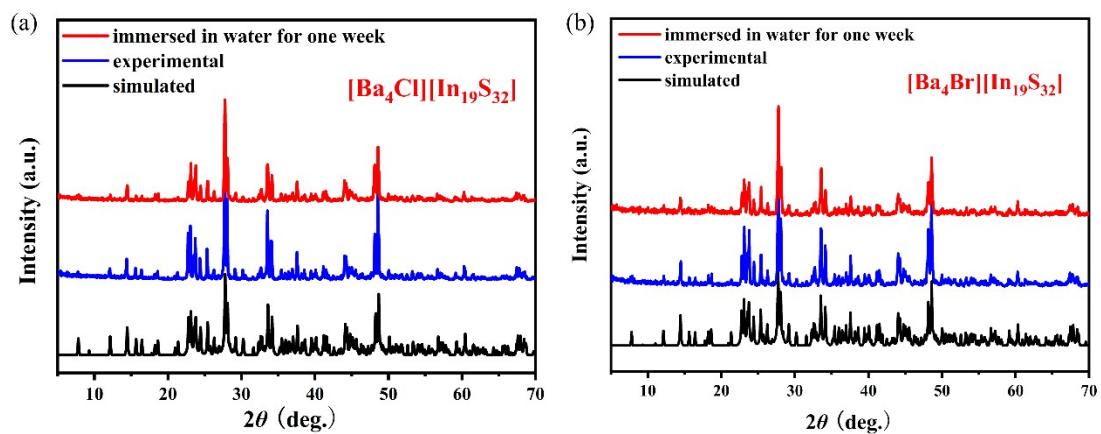

**Fig. S3.** Simulated (black), original synthesized (blue) and immersed in water for one week (red) PXRD patterns of  $[\text{Ba}_4\text{X}][\text{In}_{19}\text{S}_{32}]$  ( $\text{X} = \text{Cl}, \text{Br}$ ).

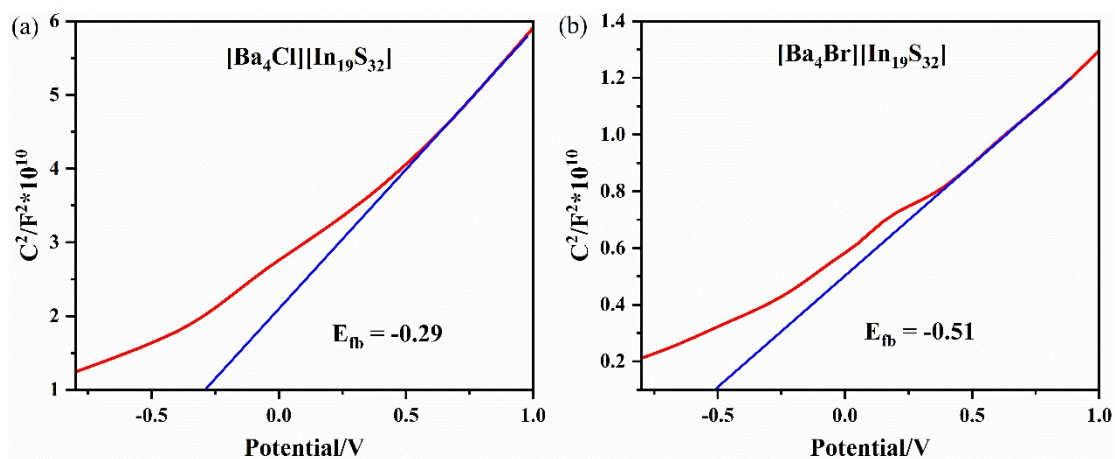

**Fig. S4.** Mott-Schottky plot of the as-prepared  $[\text{Ba}_4\text{X}][\text{In}_{19}\text{S}_{32}]$  ( $\text{X} = \text{Cl}, \text{Br}$ ) sample.

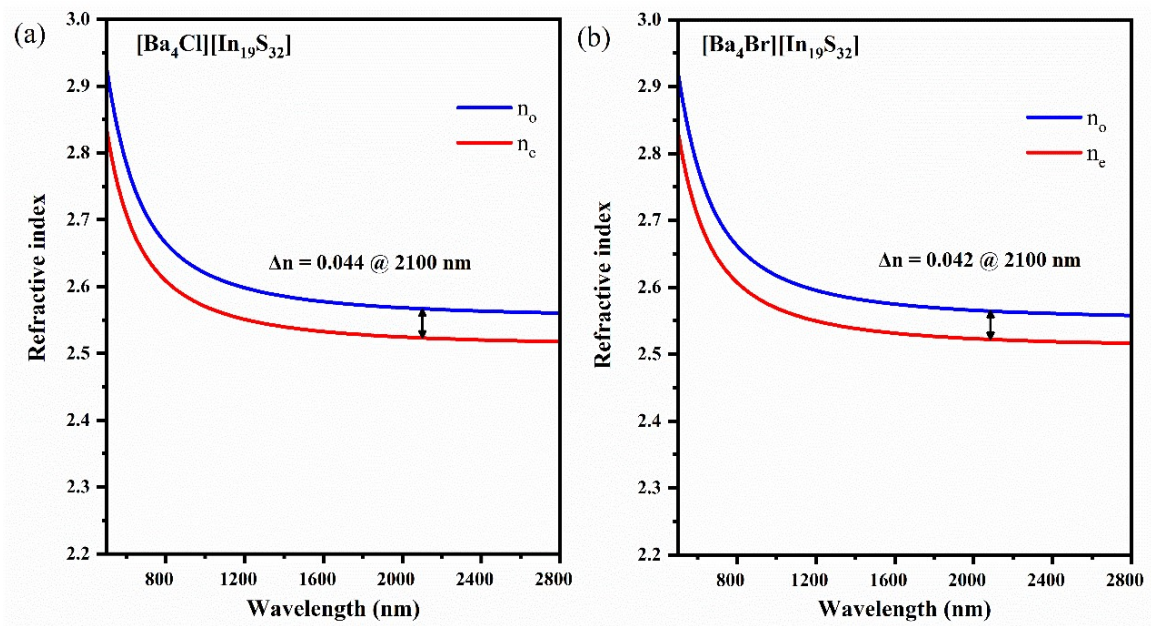

**Fig. S5.** The calculated birefringence of (a) [Ba<sub>4</sub>Cl][In<sub>19</sub>S<sub>32</sub>] and (b) [Ba<sub>4</sub>Br][In<sub>19</sub>S<sub>32</sub>].

**Table S1** Atomic coordinates and equivalent isotropic displacement parameters for [Ba<sub>4</sub>Cl][In<sub>19</sub>S<sub>32</sub>].

| Atom | Wyckoff position | x          | y          | z           | U <sub>eq</sub> (Å <sup>2</sup> ) <sup>a</sup> |
|------|------------------|------------|------------|-------------|------------------------------------------------|
| Ba1  | 16h              | 0          | 0.63499(2) | 0.27935(3)  | 0.02049(9)                                     |
| In1  | 32i              | 0.15969(2) | 0.66916(2) | 0.49465(2)  | 0.01213(8)                                     |
| In2  | 4b               | 0          | 0.75       | 0.625       | 0.0106(13)                                     |
| In3  | 8c               | 0.25       | 0.75       | 0.25        | 0.01451(11)                                    |
| In4  | 16f              | 0.15612(2) | 0.5        | 0.5         | 0.01268(9)                                     |
| In5  | 16g              | 0.16931(2) | 0.41931(2) | 0.875       | 0.01001(9)                                     |
| S1   | 16h              | 0.07802(5) | 0.75       | 0.46454(10) | 0.0121(2)                                      |
| S2   | 32i              | 0.08358(4) | 0.58594(3) | 0.50463(7)  | 0.01075(17)                                    |
| S3   | 16h              | 0.23954(5) | 0.75       | 0.48824(9)  | 0.0101(2)                                      |
| S4   | 32i              | 0.16714(3) | 0.50986(4) | 0.74671(7)  | 0.01004(17)                                    |
| S5   | 32i              | 0.1586(4)  | 0.32653(4) | 0.75989(7)  | 0.01307(17)                                    |
| Cl1  | 4a               | 0          | 0.75       | 0.125       | 0.0153(4)                                      |

<sup>a</sup> U<sub>eq</sub> is defined as one-third of the trace of the orthogonalized U<sub>ij</sub> tensor.

**Table S2** Atomic coordinates and equivalent isotropic displacement parameters for [Ba<sub>4</sub>Br][In<sub>19</sub>S<sub>32</sub>].

| Atom | Wyckoff position | x          | y          | z          | U <sub>eq</sub> (Å <sup>2</sup> ) <sup>a</sup> |
|------|------------------|------------|------------|------------|------------------------------------------------|
| Ba1  | 16h              | 0.5        | 0.63128(2) | 0.71854(2) | 0.02263(8)                                     |
| In1  | 32i              | 0.34055(2) | 0.66911(2) | 0.50579(2) | 0.0133(6)                                      |
| In2  | 4a               | 0.5        | 0.75       | 0.375      | 0.01119(12)                                    |
| In3  | 8d               | 0.25       | 0.75       | 0.75       | 0.01534(10)                                    |
| In4  | 16f              | 0.34323(2) | 0.5        | 0.5        | 0.01383(8)                                     |
| In5  | 16g              | 0.33057(2) | 0.41943(2) | 0.125      | 0.01109(7)                                     |
| S1   | 16h              | 0.42166(5) | 0.75       | 0.53405(9) | 0.0129(2)                                      |
| S2   | 32i              | 0.41592(3) | 0.58568(3) | 0.49488(6) | 0.01176(15)                                    |
| S3   | 16h              | 0.261(4)   | 0.75       | 0.51192(8) | 0.0105(2)                                      |
| S4   | 32i              | 0.33296(3) | 0.50974(3) | 0.25337(6) | 0.01094(15)                                    |
| S5   | 32i              | 0.4232(3)  | 0.40907(3) | 0.00981(7) | 0.01406(16)                                    |
| Br1  | 4b               | 0.5        | 0.75       | 0.875      | 0.01638(18)                                    |

<sup>a</sup> U<sub>eq</sub> is defined as one-third of the trace of the orthogonalized U<sub>ij</sub> tensor.



**Table S3** Selected band distances (Å) and band angles (°) for [Ba<sub>4</sub>Cl][In<sub>19</sub>S<sub>32</sub>].

|                                        |            |                                       |            |
|----------------------------------------|------------|---------------------------------------|------------|
| In1–S4 <sup>9</sup>                    | 2.6691(8)  | In4–S4                                | 2.6096(7)  |
| In1–S2                                 | 2.5521(8)  | In4–S4 <sup>2</sup>                   | 2.6686(8)  |
| In1–S2 <sup>9</sup>                    | 2.6327(8)  | In4–S4 <sup>10</sup>                  | 2.6686(8)  |
| In1–S3                                 | 2.5700(8)  | In4–S2                                | 2.5432(8)  |
| In1–S1                                 | 2.6174(8)  | In4–S2 <sup>9</sup>                   | 2.5431(8)  |
| In1–S5 <sup>10</sup>                   | 2.6721(8)  | In5–S4                                | 2.4506(8)  |
| In2–S1                                 | 2.4384(10) | In5–S4 <sup>6</sup>                   | 2.4506(8)  |
| In2–S1 <sup>7</sup>                    | 2.4384(10) | In5–S5                                | 2.4326(8)  |
| In2–S1 <sup>8</sup>                    | 2.4384(10) | In5–S5 <sup>6</sup>                   | 2.4326(8)  |
| In2–S1 <sup>3</sup>                    | 2.4384(10) | Ba1–Cl1                               | 3.0632(3)  |
| In3–S3                                 | 2.5104(10) | Ba1–S2 <sup>1</sup>                   | 3.2229(8)  |
| In3–S3 <sup>11</sup>                   | 2.5104(10) | Ba1–S2                                | 3.2229(8)  |
| In3–S5 <sup>12</sup>                   | 2.6973(8)  | Ba1–S3 <sup>2</sup>                   | 3.3169(11) |
| In3–S5 <sup>13</sup>                   | 2.6973(8)  | Ba1–S1 <sup>3</sup>                   | 3.6943(8)  |
| In3–S5 <sup>10</sup>                   | 2.6973(8)  | Ba1–S1                                | 3.6944(8)  |
| In3–S5 <sup>14</sup>                   | 2.6973(8)  | Ba1–S5 <sup>4</sup>                   | 3.4578(8)  |
| In4–S4 <sup>9</sup>                    | 2.6097(7)  | Ba1–S5 <sup>5</sup>                   | 3.4578(8)  |
| S4 <sup>10</sup> —In1—S5 <sup>9</sup>  | 93.84(2)   | S2—In4—S4 <sup>9</sup>                | 98.38(3)   |
| S2 <sup>10</sup> —In1—S4 <sup>10</sup> | 85.60(2)   | S2—In4—S4                             | 88.70(2)   |
| S2—In1—S4 <sup>10</sup>                | 85.36(3)   | S2 <sup>9</sup> —In4—S4 <sup>9</sup>  | 88.70(2)   |
| S2—In1—S2 <sup>10</sup>                | 88.11(3)   | S2 <sup>9</sup> —In4—S4 <sup>10</sup> | 174.76(2)  |
| S2—In1—S3                              | 177.64(3)  | S2 <sup>9</sup> —In4—S2               | 99.69(4)   |
| S2—In1—S1                              | 92.53(3)   | S4 <sup>6</sup> —In5—S4               | 109.57(4)  |
| S2 <sup>10</sup> —In1—S5 <sup>9</sup>  | 178.22(3)  | S5—In5—S4                             | 116.48(3)  |
| S2—In1—S5 <sup>9</sup>                 | 93.54(3)   | S5 <sup>6</sup> —In5—S4 <sup>6</sup>  | 116.48(3)  |

|                                        |           |                                          |             |
|----------------------------------------|-----------|------------------------------------------|-------------|
| S3—In1—S4 <sup>10</sup>                | 92.41(3)  | S5 <sup>6</sup> —In5—S4                  | 109.79(3)   |
| S3—In1—S2 <sup>10</sup>                | 90.95(3)  | S5—In5—S4 <sup>6</sup>                   | 109.78(3)   |
| S3—In1—S1                              | 89.76(3)  | S5—In5—S5 <sup>6</sup>                   | 94.29(4)    |
| S3—In1—S5 <sup>9</sup>                 | 87.39(3)  | Ba1 <sup>16</sup> —Cl1—Ba1 <sup>3</sup>  | 106.223(5)  |
| S1—In1—S4 <sup>10</sup>                | 174.51(3) | Ba1—Cl1—Ba1 <sup>16</sup>                | 106.224(5)  |
| S1—In1—S2 <sup>10</sup>                | 99.41(3)  | Ba1—Cl1—Ba1 <sup>3</sup>                 | 116.182(11) |
| S1—In1—S5 <sup>9</sup>                 | 81.22(3)  | Ba1 <sup>16</sup> —Cl1—Ba1 <sup>17</sup> | 116.182(11) |
| S1 <sup>7</sup> —In2—S1 <sup>8</sup>   | 92.69(5)  | Ba1 <sup>3</sup> —Cl1—Ba1 <sup>17</sup>  | 106.223(5)  |
| S1 <sup>10</sup> —In2—S1               | 92.69(5)  | Ba1—Cl1—Ba1 <sup>16</sup>                | 106.224(5)  |
| S1 <sup>7</sup> —In2—S1 <sup>3</sup>   | 118.46(3) | Cl1—Ba1—S2                               | 132.823(15) |
| S1 <sup>8</sup> —In2—S1                | 118.46(3) | Cl1—Ba1—S2 <sup>1</sup>                  | 132.824(15) |
| S1 <sup>7</sup> —In2—S1                | 118.46(3) | Cl1—Ba1—S3 <sup>2</sup>                  | 140.621(19) |
| S1 <sup>3</sup> —In2—S1 <sup>8</sup>   | 118.46(3) | Cl1—Ba1—S1                               | 71.365(14)  |
| S3—In3—S3 <sup>11</sup>                | 180.0     | Cl1—Ba1—S1 <sup>3</sup>                  | 71.365(14)  |
| S3 <sup>11</sup> —In3—S5 <sup>12</sup> | 88.06(2)  | Cl1—Ba1—S5 <sup>4</sup>                  | 79.039(15)  |
| S3 <sup>11</sup> —In3—S5 <sup>9</sup>  | 91.94(2)  | Cl1—Ba1—S5 <sup>5</sup>                  | 79.039(14)  |
| S3—In3—S5 <sup>13</sup>                | 88.06(2)  | S2—Ba1—S2 <sup>1</sup>                   | 71.80(3)    |
| S3 <sup>11</sup> —In3—S5 <sup>14</sup> | 88.06(2)  | S2 <sup>1</sup> —Ba1—S3 <sup>2</sup>     | 75.76(2)    |
| S3—In3—S5 <sup>12</sup>                | 91.94(2)  | S2—Ba1—S3 <sup>2</sup>                   | 75.76(2)    |
| S3—In3—S5 <sup>9</sup>                 | 88.06(2)  | S2 <sup>1</sup> —Ba1—S1 <sup>3</sup>     | 64.952(18)  |
| S3 <sup>11</sup> —In3—S5 <sup>13</sup> | 91.94(2)  | S2—Ba1—S1                                | 64.951(18)  |
| S3—In3—S5 <sup>14</sup>                | 91.94(2)  | S2—Ba1—S1 <sup>3</sup>                   | 97.85(2)    |
| S5 <sup>9</sup> —In3—S5 <sup>14</sup>  | 100.19(4) | S2 <sup>1</sup> —Ba1—S1                  | 97.85(2)    |
| S5 <sup>14</sup> —In3—S5 <sup>13</sup> | 180.00(3) | S2 <sup>1</sup> —Ba1—S5 <sup>4</sup>     | 102.00(2)   |
| S5 <sup>9</sup> —In3—S5 <sup>13</sup>  | 79.81(4)  | S2 <sup>1</sup> —Ba1—S5 <sup>5</sup>     | 142.64(2)   |
| S5 <sup>12</sup> —In3—S5 <sup>14</sup> | 79.81(4)  | S2—Ba1—S5 <sup>5</sup>                   | 102.00(2)   |
| S5 <sup>12</sup> —In3—S5 <sup>13</sup> | 100.19(4) | S2—Ba1—S5 <sup>4</sup>                   | 142.64(2)   |

|                                       |           |                                      |             |
|---------------------------------------|-----------|--------------------------------------|-------------|
| S5 <sup>12</sup> —In3—S5 <sup>9</sup> | 180.0     | S3 <sup>2</sup> —Ba1—S1              | 140.019(17) |
| S4—In4—S4 <sup>9</sup>                | 169.04(4) | S3 <sup>2</sup> —Ba1—S1 <sup>3</sup> | 140.019(17) |
| S4 <sup>10</sup> —In4—S4 <sup>2</sup> | 89.21(3)  | S3 <sup>2</sup> —Ba1—S5 <sup>4</sup> | 67.113(19)  |
| S4—In4—S4 <sup>10</sup>               | 81.91(3)  | S3 <sup>2</sup> —Ba1—S5 <sup>5</sup> | 67.113(19)  |
| S4 <sup>9</sup> —In4—S4 <sup>2</sup>  | 81.91(3)  | S1 <sup>3</sup> —Ba1—S1              | 57.05(3)    |
| S4—In4—S4 <sup>2</sup>                | 90.28(2)  | S5 <sup>4</sup> —Ba1—S1 <sup>3</sup> | 113.05(2)   |
| S4 <sup>9</sup> —In4—S4 <sup>10</sup> | 90.28(2)  | S5 <sup>4</sup> —Ba1—S1              | 150.40(2)   |
| S2 <sup>9</sup> —In4—S4               | 98.38(3)  | S5 <sup>5</sup> —Ba1—S1              | 113.05(2)   |
| S2 <sup>9</sup> —In4—S4 <sup>2</sup>  | 85.55(2)  | S5 <sup>5</sup> —Ba1—S1 <sup>3</sup> | 150.40(2)   |
| S2—In4—S4 <sup>10</sup>               | 85.55(2)  | S5 <sup>4</sup> —Ba1—S5 <sup>5</sup> | 60.05(3)    |
| S2—In4—S4 <sup>2</sup>                | 174.75(2) |                                      |             |

---

Symmetry codes: <sup>1</sup>-X,+Y,+Z; <sup>2</sup>3/4-Y,1/4+X,-1/4+Z; <sup>3</sup>-X,3/2-Y,+Z; <sup>4</sup>1/4-Y,3/4-X,-3/4+Z; <sup>5</sup>-1/4+Y,3/4-X,-3/4+Z; <sup>6</sup>-1/4+Y,1/4+X,7/4-Z; <sup>7</sup>3/4-Y,3/4+X,5/4-Z; <sup>8</sup>-3/4+Y,3/4-X,5/4-Z; <sup>9</sup>+X,1-Y,1-Z; <sup>10</sup>3/4-Y,3/4-X,5/4-Z; <sup>11</sup>1/2-X,3/2-Y,1/2-Z; <sup>12</sup>1/2-X,1/2+Y,-1/2+Z; <sup>13</sup>+X,1/2+Y,1-Z; <sup>14</sup>1/2-X,1-Y,-1/2+Z; <sup>15</sup>-1/4+Y,3/4-X,1/4+Z; <sup>16</sup>-3/4+Y,3/4-X,1/4-Z; <sup>17</sup>3/4-Y,3/4+X,1/4-Z

**Table S4** Selected band distances (Å) and band angles (°) for [Ba<sub>4</sub>Br][In<sub>19</sub>S<sub>32</sub>].

|                                       |            |                                        |            |
|---------------------------------------|------------|----------------------------------------|------------|
| In1–S4 <sup>9</sup>                   | 2.6783(7)  | In4–S4 <sup>4</sup>                    | 2.6089(7)  |
| In1–S3                                | 2.5718(7)  | In4–S4                                 | 2.6090(7)  |
| In1–S2 <sup>9</sup>                   | 2.6349(7)  | In4–S4 <sup>9</sup>                    | 2.6675(8)  |
| In1–S2                                | 2.5505(7)  | In4–S4 <sup>1</sup>                    | 2.6675(8)  |
| In1–S1                                | 2.6129(8)  | In4–S2 <sup>4</sup>                    | 2.5467(8)  |
| In1–S5 <sup>10</sup>                  | 2.6683(7)  | In4–S2                                 | 2.5468(8)  |
| In2–S1 <sup>6</sup>                   | 2.4372(10) | In5–S4                                 | 2.4509(7)  |
| In2–S1 <sup>7</sup>                   | 2.4372(10) | In5–S4 <sup>5</sup>                    | 2.4509(7)  |
| In2–S1 <sup>8</sup>                   | 2.4372(10) | In5–S5 <sup>5</sup>                    | 2.4339(8)  |
| In2–S1                                | 2.4372(10) | In5–S5                                 | 2.4338(8)  |
| In3–S3 <sup>11</sup>                  | 2.5118(9)  | Ba1–Br1                                | 3.1521(3)  |
| In3–S3                                | 2.5117(9)  | Ba1–S3 <sup>1</sup>                    | 3.2563(11) |
| In3–S5 <sup>9</sup>                   | 2.6991(8)  | Ba1–S2                                 | 3.1954(7)  |
| In3–S5 <sup>6</sup>                   | 2.6991(8)  | Ba1–S2 <sup>2</sup>                    | 3.1955(7)  |
| In3–S5 <sup>10</sup>                  | 2.6991(8)  | Ba1–S5 <sup>3</sup>                    | 3.4638(8)  |
| In3–S5 <sup>12</sup>                  | 2.6991(8)  | Ba1–S5 <sup>4</sup>                    | 3.4638(8)  |
| S3—In1—S4 <sup>9</sup>                | 92.36(2)   | S2 <sup>3</sup> —In4—S4                | 98.23(2)   |
| S3—In1—S2 <sup>9</sup>                | 90.87(3)   | S2—In4—S4 <sup>1</sup>                 | 175.11(2)  |
| S3—In1—S1                             | 89.43(2)   | S2—In4—S4 <sup>9</sup>                 | 85.48(2)   |
| S3—In1—S5 <sup>10</sup>               | 87.28(3)   | S23—In4—S4 <sup>3</sup>                | 88.41(2)   |
| S2—In1—S4 <sup>9</sup>                | 85.18(2)   | S2—In4—S4                              | 88.41(2)   |
| S2 <sup>9</sup> —In1—S4 <sup>9</sup>  | 85.16(2)   | S5 <sup>12</sup> —In3—S5 <sup>6</sup>  | 99.70(3)   |
| S2—In1—S3                             | 177.33(3)  | S5 <sup>9</sup> —In3—S5 <sup>10</sup>  | 99.70(3)   |
| S2—In1—S2 <sup>9</sup>                | 87.87(2)   | S5 <sup>12</sup> —In3—S5 <sup>10</sup> | 80.30(3)   |
| S2—In1—S1                             | 93.10(2)   | S5 <sup>10</sup> —In3—S5 <sup>6</sup>  | 180.0      |
| S2 <sup>9</sup> —In1—S5 <sup>10</sup> | 177.75(2)  | S2 <sup>3</sup> —In4—S4 <sup>1</sup>   | 85.48(2)   |

|                                        |           |                                          |              |
|----------------------------------------|-----------|------------------------------------------|--------------|
| S2—In1—S5 <sup>10</sup>                | 93.93(2)  | S2 <sup>3</sup> —In4—S4 <sup>9</sup>     | 175.11(2)    |
| S1—In1—S4 <sup>9</sup>                 | 175.15(3) | S2 <sup>3</sup> —In4—S2                  | 99.40(3)     |
| S1—In1—S2 <sup>9</sup>                 | 99.33(3)  | S4—In5—S4 <sup>5</sup>                   | 109.83(4)    |
| S1—In1—S5 <sup>10</sup>                | 81.94(3)  | S5 <sup>5</sup> —In5—S4                  | 116.41(2)    |
| S5 <sup>10</sup> —In1—S4 <sup>9</sup>  | 93.64(2)  | S5—In5—S4                                | 109.55(2)    |
| S1 <sup>6</sup> —In2—S1                | 117.99(3) | S5—In5—S4 <sup>5</sup>                   | 116.41(2)    |
| S1 <sup>7</sup> —In2—S1 <sup>8</sup>   | 117.99(3) | S5 <sup>5</sup> —In5—S4 <sup>5</sup>     | 109.55(2)    |
| S1 <sup>7</sup> —In2—S1                | 93.51(5)  | S5—In5—S5 <sup>5</sup>                   | 94.62(4)     |
| S1 <sup>8</sup> —In2—S16               | 117.99(3) | Ba1—Br1—Ba1 <sup>13</sup>                | 105.756(5)   |
| S1 <sup>7</sup> —In2—S1                | 117.99(3) | Ba1 <sup>14</sup> —Br1—Ba1 <sup>13</sup> | 117.188(10)  |
| S1 <sup>7</sup> —In2—S1 <sup>6</sup>   | 93.51(5)  | Ba1—Br1—Ba1 <sup>14</sup>                | 105.756(5)   |
| S3—In3—S3 <sup>11</sup>                | 180.00(5) | Ba1 <sup>8</sup> —Br1—Ba1 <sup>13</sup>  | 105.756(5)   |
| S3 <sup>11</sup> —In3—S5 <sup>9</sup>  | 87.83(2)  | Ba1 <sup>14</sup> —Br1—Ba1 <sup>8</sup>  | 105.756(5)   |
| S3 <sup>11</sup> —In3—S5 <sup>6</sup>  | 87.83(2)  | Ba1—Br1—Ba1 <sup>8</sup>                 | 117.188(10)  |
| S3—In3—S5 <sup>9</sup>                 | 92.17(2)  | Br1—Ba1—S31                              | 140.554 (18) |
| S3—In3—S5 <sup>6</sup>                 | 92.17(2)  | Br1—Ba1—S2                               | 131.217 (15) |
| S3—In3—S5 <sup>12</sup>                | 87.83(2)  | Br1—Ba1—S2 <sup>2</sup>                  | 131.217 (15) |
| S3 <sup>11</sup> —In3—S5 <sup>10</sup> | 92.17(2)  | Br1—Ba1—S5 <sup>3</sup>                  | 78.247 (14)  |
| S3 <sup>11</sup> —In3—S5 <sup>12</sup> | 92.17(2)  | Br1—Ba1—S5 <sup>4</sup>                  | 78.247 (14)  |
| S3—In3—S5 <sup>10</sup>                | 87.83(2)  | S31—Ba1—S5 <sup>4</sup>                  | 67.879 (19)  |
| S5 <sup>12</sup> —In3—S5 <sup>9</sup>  | 180.0     | S3 <sup>1</sup> —Ba1—S5 <sup>3</sup>     | 67.879 (19)  |
| S5 <sup>9</sup> —In3—S5 <sup>6</sup>   | 80.30(3)  | S2 <sup>2</sup> —Ba1—S3 <sup>1</sup>     | 77.440 (19)  |
| S4 <sup>3</sup> —In4—S4                | 169.76(3) | S2—Ba1—S3 <sup>1</sup>                   | 77.441 (19)  |
| S4 <sup>3</sup> —In4—S4 <sup>9</sup>   | 90.54(2)  | S2—Ba1—S2 <sup>2</sup>                   | 73.20 (3)    |
| S4 <sup>3</sup> —In4—S4 <sup>1</sup>   | 82.18(2)  | S2—Ba1—S5 <sup>3</sup>                   | 102.709 (18) |
| S4 <sup>1</sup> —In4—S4 <sup>9</sup>   | 89.64(3)  | S2 <sup>2</sup> —Ba1—S5 <sup>3</sup>     | 145.00 (2)   |
| S4—In4—S4 <sup>9</sup>                 | 82.18(2)  | S2—Ba1—S5 <sup>4</sup>                   | 145.00 (2)   |

|                        |          |                                      |              |
|------------------------|----------|--------------------------------------|--------------|
| S4—In4—S4 <sup>1</sup> | 90.54(2) | S2 <sup>2</sup> —Ba1—S5 <sup>4</sup> | 102.708 (18) |
| S2—In4—S4 <sup>3</sup> | 98.23(2) | S5 <sup>4</sup> —Ba1—S5 <sup>3</sup> | 60.32 (2)    |

---

Symmetry codes: <sup>1</sup>-1/4+Y,3/4-X,1/4+Z; <sup>2</sup>1-X,+Y,+Z; <sup>3</sup>+X,1-Y,1-Z; <sup>4</sup>1-X,1-Y,1-Z;  
<sup>5</sup>3/4-Y,3/4-X,1/4-Z; <sup>6</sup>-1/4+Y,5/4-X,3/4-Z; <sup>7</sup>5/4-Y,1/4+X,3/4-Z; <sup>8</sup>1-X,3/2-Y,+Z; <sup>9</sup>-  
1/4+Y,1/4+X,3/4-Z; <sup>10</sup>3/4-Y,1/4+X,3/4+Z; <sup>11</sup>1/2-X,3/2-Y,3/2-Z; <sup>12</sup>3/4-Y,5/4-X,3/4+Z;  
<sup>13</sup>-1/4+Y,5/4-X,7/4-Z; <sup>14</sup>5/4-Y,1/4+X,7/4-Z

**Table S5** Photocurrent responses of some crystalline compounds.

| Compound                                                                                                             | Photocurrent response       | Bias voltage | Substrate |
|----------------------------------------------------------------------------------------------------------------------|-----------------------------|--------------|-----------|
| Cs <sub>3</sub> CuAs <sub>4</sub> S <sub>8</sub> <sup>1</sup>                                                        | 5 $\mu\text{A cm}^{-2}$     | -            | ITO       |
| Cs <sub>3</sub> CuAs <sub>4</sub> Se <sub>8</sub> <sup>1</sup>                                                       | 5 $\mu\text{A cm}^{-2}$     | -            | ITO       |
| Rb <sub>2</sub> Ba <sub>3</sub> Cu <sub>2</sub> Sb <sub>2</sub> S <sub>10</sub> <sup>2</sup>                         | 6 nA $\text{cm}^{-2}$       | 0.174 V      | ITO       |
| SrCuSbS <sub>3</sub> <sup>3</sup>                                                                                    | 0.54 $\mu\text{A cm}^{-2}$  | 1.0 V        | FTO       |
| BaCuSbS <sub>3</sub> <sup>4</sup>                                                                                    | 55 nA $\text{cm}^{-2}$      | -            | ITO       |
| Ba <sub>5</sub> Bi <sub>2</sub> Co <sub>2</sub> S <sub>10</sub> <sup>5</sup>                                         | 4 mA $\text{cm}^{-2}$       | 1.0 V        | -         |
| Rb <sub>2</sub> CuSb <sub>7</sub> S <sub>12</sub> <sup>6</sup>                                                       | 10 $\mu\text{A cm}^{-2}$    | 0.18 V       | ITO       |
| Pb <sub>3</sub> P <sub>2</sub> S <sub>8</sub> <sup>7</sup>                                                           | 45 $\mu\text{A cm}^{-2}$    | -            | FTO       |
| Ba <sub>3</sub> HgGa <sub>2</sub> S <sub>7</sub> <sup>8</sup>                                                        | 12.2 $\mu\text{A cm}^{-2}$  | 1.0 V        | ITO       |
| Lu <sub>5</sub> GaS <sub>9</sub> <sup>9</sup>                                                                        | 150 nA $\text{cm}^{-2}$     | -            | ITO       |
| Zn <sub>4</sub> B <sub>6</sub> O <sub>12</sub> S <sup>10</sup>                                                       | 2.1 $\mu\text{A cm}^{-2}$   | 0.6 V        | ITO       |
| [(Ba <sub>19</sub> Cl <sub>4</sub> )(Ga <sub>6</sub> Si <sub>12</sub> O <sub>42</sub> S <sub>8</sub> )] <sup>1</sup> | 150 nA $\text{cm}^{-2}$     | -            | ITO       |
| 1                                                                                                                    |                             |              |           |
| Sr <sub>6</sub> Cd <sub>2</sub> Sb <sub>6</sub> S <sub>10</sub> O <sub>7</sub> <sup>12</sup>                         | 2 $\mu\text{A cm}^{-2}$     | 0.4 V        | ITO       |
| RbIn <sub>4</sub> S <sub>6</sub> Cl <sup>13</sup>                                                                    | 28.75 nA $\text{cm}^{-2}$   | 5 V          | -         |
| CsIn <sub>4</sub> S <sub>6</sub> Cl <sup>13</sup>                                                                    | 55.12 nA $\text{cm}^{-2}$   | 5 V          | -         |
| Pb <sub>5</sub> Sn <sub>3</sub> S <sub>10</sub> Cl <sub>2</sub> <sup>13</sup>                                        | 19.58 mA $\text{cm}^{-2}$   | 5 V          | -         |
| Pb <sub>5</sub> Sn <sub>3</sub> Se <sub>10</sub> Cl <sub>2</sub> <sup>13</sup>                                       | 36.12 $\mu\text{A cm}^{-2}$ | 5 V          | -         |

“-” indicates no available data.

## References

1. C. Liu, H. D. Yang, P. P. Hou, Y. Xiao, Y. Liu and H. Lin, *Dalton Trans.*, 2022, **51**, 904-909.
2. C. Liu, Y. Xiao, H. Wang, W. X. Chai, X. F. Liu, D. M. Yan, H. Lin and Y. Liu, *Inorg. Chem.*, 2020, **59**, 1577-1581.
3. X. Zhang, J. Q. He, R. Q. Wang, K. J. Bu, J. C. Li, C. Zheng, J. H. Lin and F. Q. Huang, *Solar Rrl*, 2018, **2**, 1800021.
4. C. Liu, P. P. Hou, W. X. Chai, J. W. Tian, X. R. Zheng, Y. Y. Shen, M. J. Zhi, C. M. Zhou and Y. Liu, *J Alloy Compd*, 2016, **679**, 420-425.
5. K. J. Bu, X. Zhang, J. Huang, M. J. Luo, C. Zheng, R. Q. Wang, D. Wang, J. Q. He, W. Zhao, X. L. Che and F. Q. Huang, *Chem Commun*, 2019, **55**, 4809-4812.
6. Y. Xiao, S. H. Zhou, R. Yu, Y. Y. Shen, Z. J. Ma, H. Lin and Y. Liu, *Inorg. Chem.*, 2021, **60**, 9263-9267.
7. B. H. Ji, E. Guderjahn, K. Wu, T. H. Syed, W. Wei, B. B. Zhang and J. Wang, *Phys. Chem. Chem. Phys.*, 2021, **23**, 23696-23702.
8. X. Huang, S. H. Yang, W. L. Liu and S. P. Guo, *Inorg. Chem.*, 2022, **61**, 12954-12958.
9. H. Lin, J. N. Shen, W. W. Zhu, Y. Liu, X. T. Wu, Q. L. Zhu and L. M. Wu, *Dalton Trans.*, 2017, **46**, 13731-13738.
10. W. F. Zhou, W. D. Yao, R. L. Tang, H. G. Xue and S. P. Guo, *J Alloy Compd*, 2021, **867**.
11. Y. F. Shi, X. F. Li, Y. X. Zhang, H. Lin, Z. J. Ma, L. M. Wu, X. T. Wu and Q. L. Zhu, *Inorg. Chem.*, 2019, **58**, 6588-6592.
12. S. Al Bacha, S. Saitzek, E. E. McCabe and H. Kabbour, *Inorg. Chem.*, 2022, **61**, 18611-18621.
13. L. T. Jiang, M. Z. Li, X. M. Jiang, B. W. Liu and G. C. Guo, *Dalton Trans.*, 2022, **51**, 6638-6645.
